# Supplementary material
Source: PubMed Central journal article supplement (PMC7960428)
Supplement: 17-00238.pdf [file 17-00238.pdf]

**On-line Table 1: Correlation analysis of the SIESTA primary end point improvement of NIHSS after 24 hours, Tan, ASPECTS, and infarct volume in the total cohort, the group randomized to CS, and the group randomized to GA**

|                        | Tan   | ASPECTS | Infarct Volume | Improvement of NIHSS |
|------------------------|-------|---------|----------------|----------------------|
| Total cohort (n = 104) |       |         |                |                      |
| Tan                    | 1     | 0.33    | -0.43          | -0.23                |
| ASPECTS                | -0.33 | 1       | -0.60          | -0.39                |
| Infarct volume         | -0.43 | -0.60   | 1              | 0.58                 |
| Improvement of NIHSS   | -0.23 | -0.39   | 0.58           | 1                    |
| CS group (n = 52)      |       |         |                |                      |
| Tan                    | 1     | 0.26    | -0.38          | -0.28                |
| ASPECTS                | 0.26  | 1       | -0.53          | -0.25                |
| Infarct volume         | -0.38 | -0.53   | 1              | 0.43                 |
| Improvement of NIHSS   | -0.28 | -0.25   | 0.43           | 1                    |
| GA group (n = 52)      |       |         |                |                      |
| Tan                    | 1     | 0.38    | -0.49          | -0.17                |
| ASPECTS                | 0.38  | 1       | -0.62          | -0.51                |
| Infarct volume         | -0.49 | -0.62   | 1              | 0.71                 |
| Improvement of NIHSS   | -0.17 | -0.51   | 0.71           | 1                    |

**On-line Table 2: Regression analyses for improvement of NIHSS after 24 hours and infarct volume**

| Parameter                                              | Estimate | 95% CI        | P Value |
|--------------------------------------------------------|----------|---------------|---------|
| Linear regression for improvement of NIHSS after 24 hr |          |               |         |
| Intercept                                              | 17.93    | 7.79–28.06    | .0007   |
| Tan                                                    | -2.41    | -5.97–1.14    | .18     |
| ASPECTS                                                | -2.36    | -3.58–1.14    | .0002   |
| NIHSS                                                  | 1.89     | -5.34–1.55    | .28     |
| Linear regression for infarct volume                   |          |               |         |
| Intercept                                              | 278.69   | 193.77–363.61 | <.0001  |
| Tan (2–3)                                              | -51.75   | -81.58–21.92  | .0008   |
| ASPECTS                                                | -22.45   | -32.64–12.25  | <.0001  |
| NIHSS CS                                               | 1.68     | -27.19–30.55  | .91     |

**On-line Table 3: Logistic regression for dichotomized mRS after 3 months<sup>a</sup>**

| Parameter  | OR   | 95% CI     | P Value |
|------------|------|------------|---------|
| Tan (2–3)  | 1.02 | 0.372–2.84 | .96     |
| ASPECTS    | 0.72 | 0.49–1.05  | .09     |
| Group (CS) | 2.69 | 0.98–7.83  | .06     |

<sup>a</sup>Reference category is mRS = 0–2.
